# Supplementary material for: Natural Mutations Affect Structure and Function of gC1q Domain of Otolin-1
Source: MDPI journal article supplement (doi:10.3390/ijms22169085), 2021-08-23
Supplement: s1 [file s1]

# Natural mutations affect structure and function of gC1q domain of otolin-1

Rafał Hołubowicz\*, Andrzej Ożyhar, Piotr Dobryszczycki\*

Department of Biochemistry, Molecular Biology and Biotechnology, Faculty of Chemistry, Wrocław University of Science and Technology, Wybrzeże Wyspiańskiego 27, 50-370 Wrocław, Poland

\* - Corresponding Authors

R.H.: phone +48 71 320 63 34, e-mail [rafal.holubowicz@pwr.edu.pl](mailto:rafal.holubowicz@pwr.edu.pl)

A.O.: phone: +48 71 320 63 33, e-mail [andrzej.ozyhar@pwr.edu.pl](mailto:andrzej.ozyhar@pwr.edu.pl)

P.D.: phone +48 71 320 63 32, e-mail [piotr.dobryszczycki@pwr.edu.pl](mailto:piotr.dobryszczycki@pwr.edu.pl)

ORCID IDs: R.H: 0000-0002-2555-2069; A.O.: 0000-0002-5874-784X; P.D.: 0000-0001-5522-2557

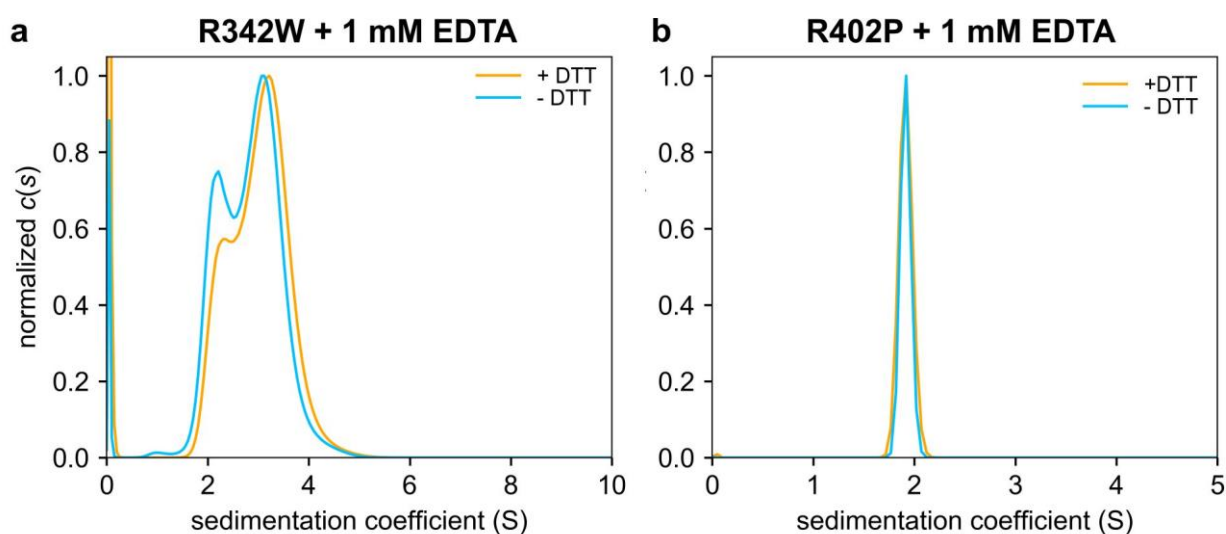

**Figure S1.** Dithiothreitol (DTT) does not affect the oligomerization of hOtolC1q R342W and R402P. Normalized sedimentation coefficient distributions ( $c(s)$ ) calculated from the sedimentation velocity analytical ultracentrifugation (SV AUC) data collected for (a) hOtolC1q R342W and (b) hOtolC1q R402P in the absence of  $\text{Ca}^{2+}$ , with or without 1 mM DTT.

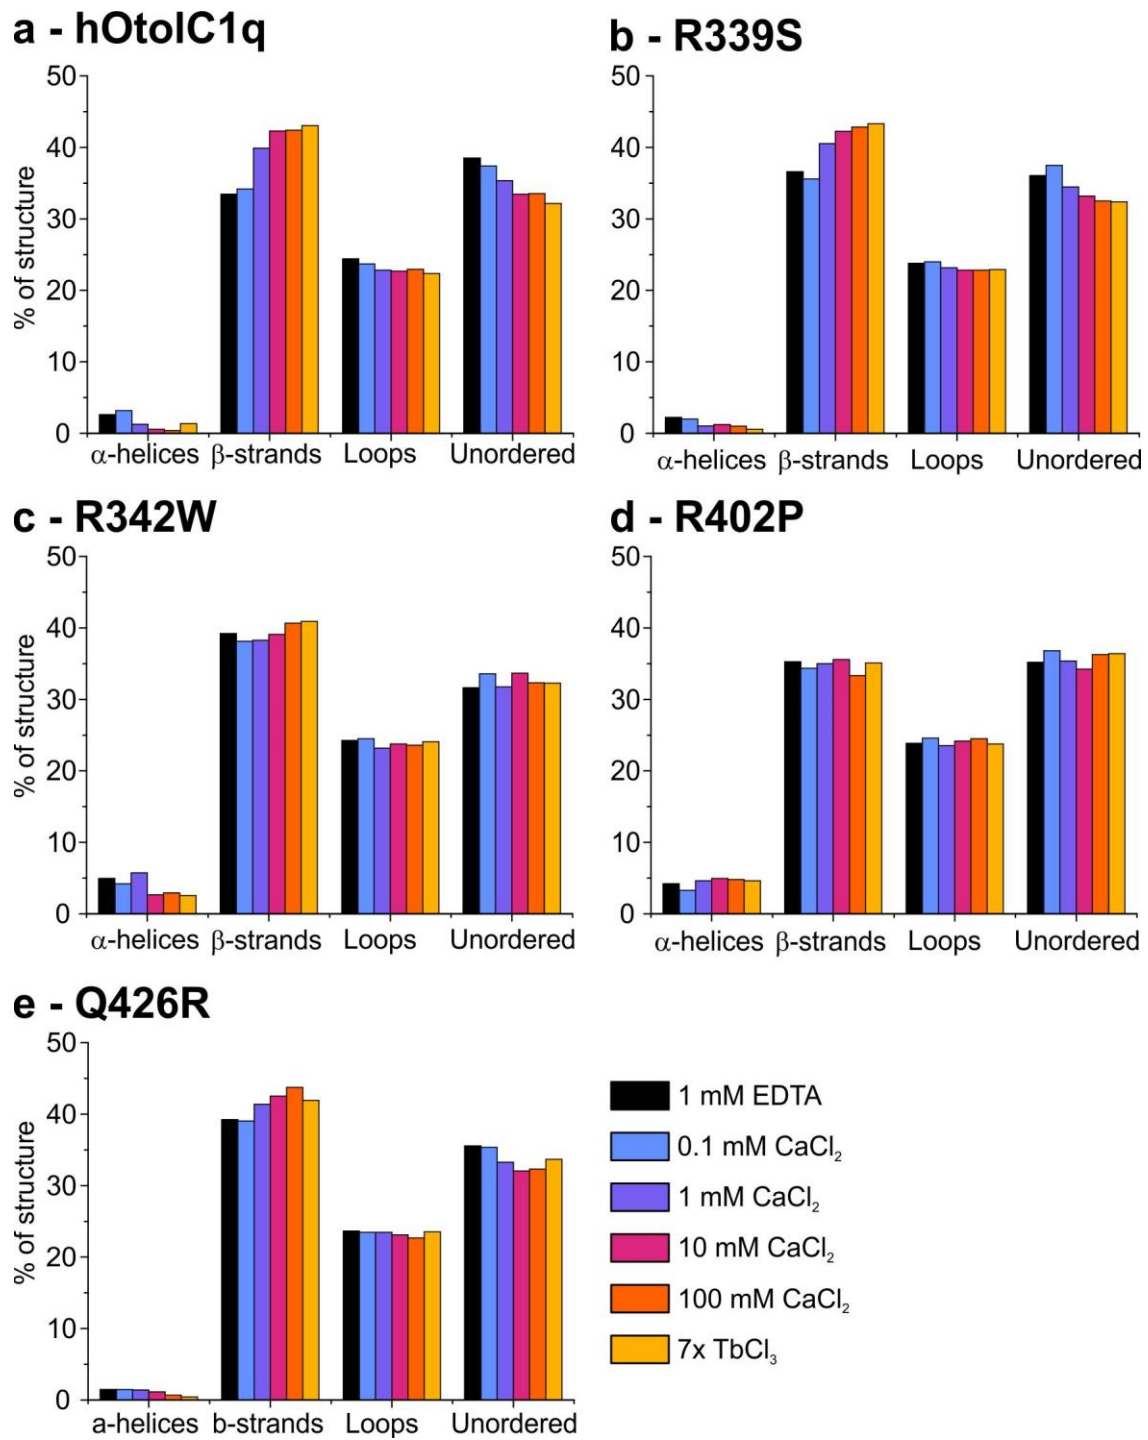

**Figure S2.** Estimation of the secondary structure content of hOtolC1q and its mutants. The analysis for (a) hOtolC1q, (b) R339S, (c) R342W, (d) R402P and (e) Q426R was done based on the CD spectra collected in the presence of EDTA, CaCl<sub>2</sub> or TbCl<sub>3</sub> using CDPro suite applications CDSSTR, CONTINLL, SELCON3 using a reference set 10 (SMP56 – 43 soluble proteins and 13 membrane proteins).

**a - hOtolC1q**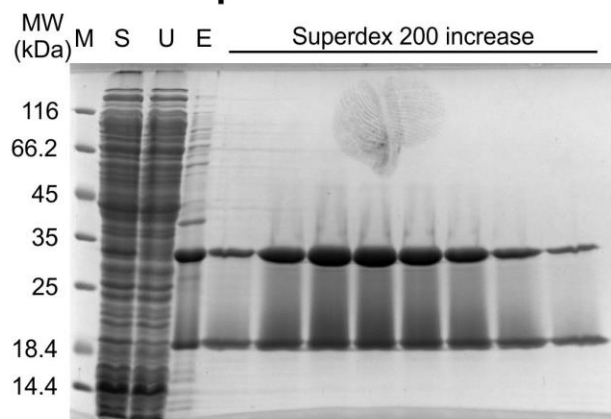**b - R339S**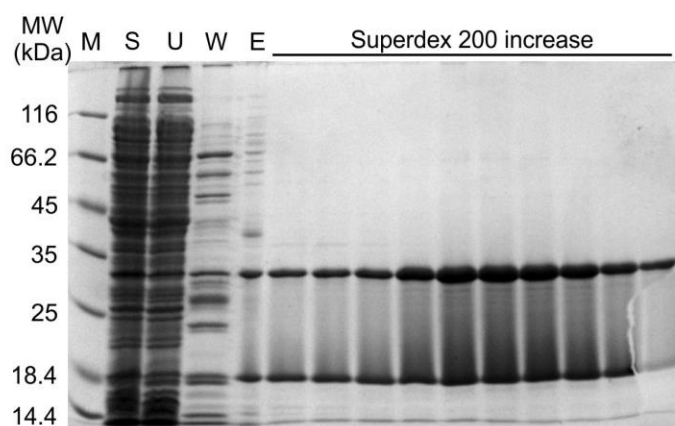**c - R342W**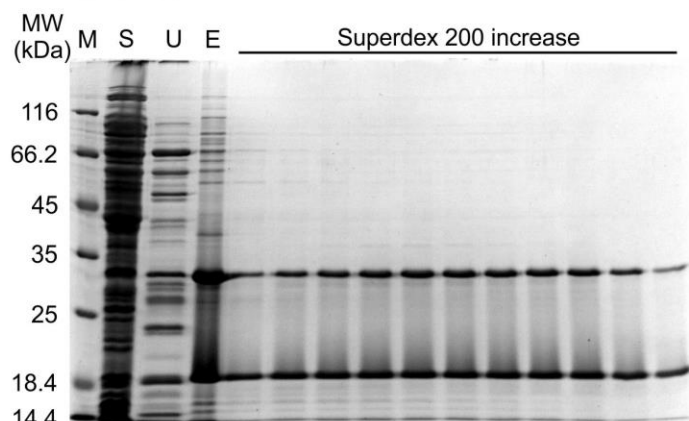**d - R402P**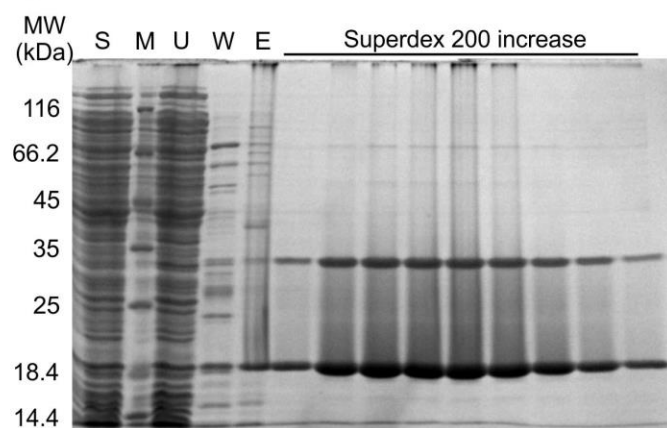**e - Q426R**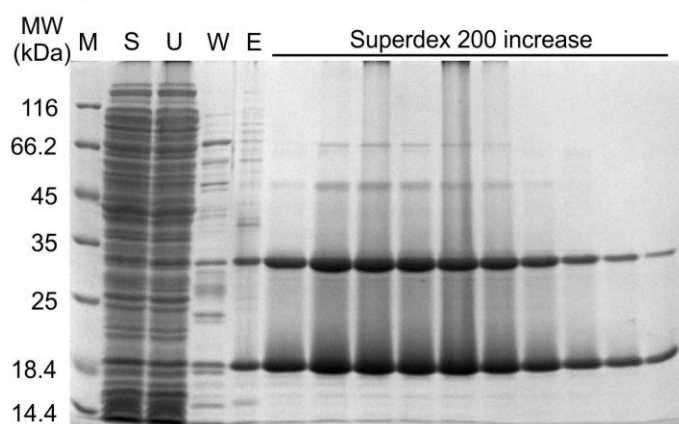

**Figure S3.** Purification of hOtolC1q and its mutants. The samples of (a) hOtolC1q, (b) R339S, (c) R342W, (d) R402P, (e) Q426R were collected during the purification and subjected to SDS-PAGE in reducing conditions. M – molecular weight marker, S – supernatant after lysis, U – proteins which did not bind to the TALON Metal Affinity Resin, W – proteins washed away at intermediate imidazole concentration, E – proteins eluted from the metal affinity resin and concentrated before the gel filtration on the Superdex 200 increase column.

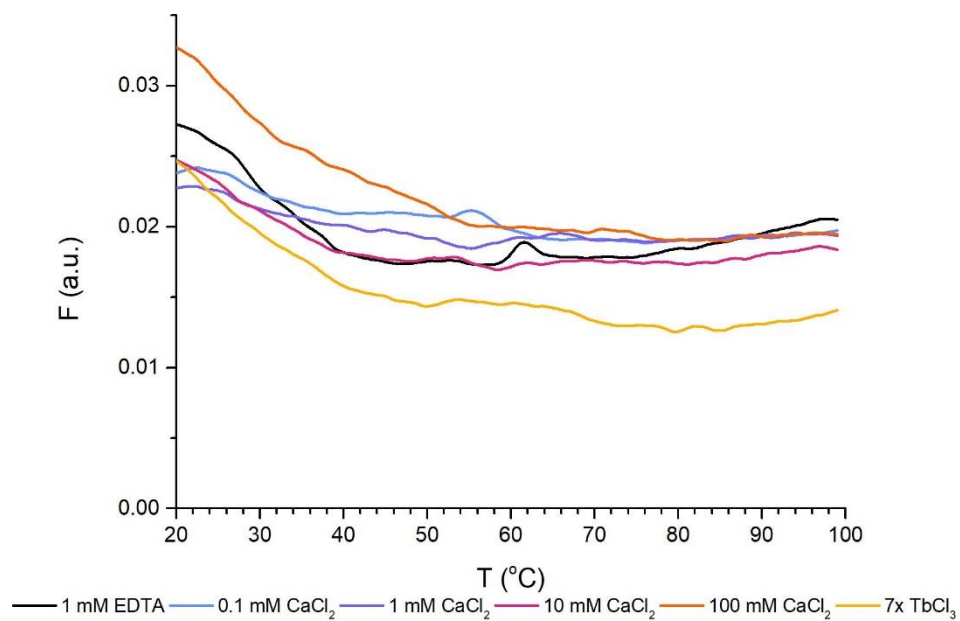

**Figure S4.** Background fluorescence in the thermal shift assay. Protein-free controls with the additives were subjected to the thermal shift assay on the same 96-well plate as the tested protein samples.

**Table S1.** Parameters derived from the sedimentation velocity analytical ultracentrifugation. The table contains solvent-corrected sedimentation coefficients ( $s_{20,w}$ ), weight averaged sedimentation coefficients ( $\overline{s_{20,w}}$ ), apparent molecular weights ( $MW_{app}$ ) and frictional ratios ( $f/f_0$ ).  $c$  – protein concentration,  $n$  – stoichiometry of the oligomer. Molecular weight of hOtolC1q and mutants is approximately 17 kDa (estimated using ProtParam tool - <https://web.expasy.org/protparam/>).

| Protein  | $c$ [mg/ml] | $s_{20,w}$ [S] |                         |                      | $\overline{s_{20,w}}$ [S] |                         |                      | $MW_{app}$ [kDa] ( $n$ )  |                            |                      | $f/f_0$   |                         |                      | RMSD      |                         |                      |
|----------|-------------|----------------|-------------------------|----------------------|---------------------------|-------------------------|----------------------|---------------------------|----------------------------|----------------------|-----------|-------------------------|----------------------|-----------|-------------------------|----------------------|
|          |             | 1 mM EDTA      | 10 mM CaCl <sub>2</sub> | 7x TbCl <sub>3</sub> | 1 mM EDTA                 | 10 mM CaCl <sub>2</sub> | 7x TbCl <sub>3</sub> | 1 mM EDTA                 | 10 mM CaCl <sub>2</sub>    | 7x TbCl <sub>3</sub> | 1 mM EDTA | 10 mM CaCl <sub>2</sub> | 7x TbCl <sub>3</sub> | 1 mM EDTA | 10 mM CaCl <sub>2</sub> | 7x TbCl <sub>3</sub> |
| hOtolC1q | 0.10        | 3.19           | 3.46                    |                      | 3.20                      | 3.46                    |                      | 38.5 (2.3)                | 44.9 (2.6)                 |                      | 1.27      | 1.30                    |                      | 0.0056    | 0.0055                  |                      |
|          | 0.25        | 3.24           | 3.46                    | 3.55                 | 3.25                      | 3.47                    | 3.55                 | 40.4 (2.4)                | 45.5 (2.7)                 | 49.0 (2.9)           | 1.29      | 1.31                    | 1.34                 | 0.0059    | 0.0057                  | 0.0050               |
|          | 0.50        | 3.30;<br>5.37  | 3.47                    |                      | 3.40                      | 3.45                    |                      | 41.6 (2.4);<br>86.5 (5.1) | 45.5 (2.7)                 |                      | 1.30      | 1.31                    |                      | 0.0064    | 0.0064                  |                      |
| R339S    | 0.10        | 2.96           | 3.48                    |                      | 2.96                      | 3.48                    |                      | 35.1 (2.1)                | 48.4 (2.8)                 |                      | 1.29      | 1.36                    |                      | 0.0042    | 0.0041                  |                      |
|          | 0.25        | 3.10           | 3.48                    | 3.52                 | 3.10                      | 3.48                    | 3.52                 | 37.1 (2.2)                | 48.7 (2.9)                 | 48.6 (2.9)           | 1.28      | 1.36                    | 1.35                 | 0.0044    | 0.0044                  | 0.0050               |
|          | 0.50        | 3.18           | 3.47                    |                      | 3.28                      | 3.47                    |                      | 37.9 (2.2)                | 48.2 (2.8)                 |                      | 1.26      | 1.36                    |                      | 0.0050    | 0.0052                  |                      |
| R342W    | 0.10        | 3.07;<br>4.26  | 3.60                    |                      | 3.68                      | 3.61                    |                      | 34.4 (2.0);<br>56.2 (3.3) | 49.0 (2.9)                 |                      | 1.22      | 1.32                    |                      | 0.0042    | 0.0043                  |                      |
|          | 0.25        | 2.95;<br>4.25  | 3.54;<br>5.21           | 4.23                 | 3.81                      | 3.60                    | 4.30                 | 33.5 (2.0);<br>57.8 (3.4) | 47.2 (2.8);<br>84.2 (5.0)  | 57.2 (3.4)           | 1.25      | 1.31                    | 1.25                 | 0.0045    | 0.0048                  | 0.0049               |
|          | 0.50        | 2.86;<br>4.32  | 3.57;<br>5.30           |                      | 4.08                      | 3.69                    |                      | 31.0 (1.8);<br>57.7 (3.4) | 47.6 (2.08);<br>86.1 (5.1) |                      | 1.23      | 1.31                    |                      | 0.0056    | 0.0058                  |                      |
| R402P    | 0.10        | 2.58           | 2.59                    |                      | 2.58                      | 2.59                    |                      | 32.3 (1.9)                | 32.6 (1.9)                 |                      | 1.40      | 1.40                    |                      | 0.0043    | 0.0042                  |                      |
|          | 0.25        | 2.58           | 2.59                    | 2.66                 | 2.58                      | 2.59                    | 2.66                 | 32.7 (1.9)                | 32.6 (1.9)                 | 31.2 (1.8)           | 1.40      | 1.40                    | 1.32                 | 0.0046    | 0.0046                  | 0.0049               |
|          | 0.50        | 2.60           | 2.61                    |                      | 2.60                      | 2.61                    |                      | 32.7 (1.9)                | 32.3 (1.9)                 |                      | 1.40      | 1.40                    |                      | 0.0055    | 0.0053                  |                      |
| Q426R    | 0.10        | 3.25           | 3.41                    |                      | 3.25                      | 3.41                    |                      | 43.8 (2.6)                | 45.1 (2.7)                 |                      | 1.36      | 1.32                    |                      | 0.0041    | 0.0041                  |                      |
|          | 0.25        | 3.30           | 3.42                    | 3.52                 | 3.30                      | 3.42                    | 3.52                 | 44.7 (2.6)                | 46.5 (2.7)                 | 48.6 (2.9)           | 1.36      | 1.34                    | 1.34                 | 0.0045    | 0.0046                  | 0.0051               |
|          | 0.50        | 3.33           | 3.44                    |                      | 3.33                      | 3.44                    |                      | 44.3 (2.6)                | 46.6 (2.7)                 |                      | 1.33      | 1.34                    |                      | 0.0054    | 0.0060                  |                      |

**Table S2.** Transition temperature ( $T_m$ ) values (in °C) determined using the thermal shift assay.

|          | 1 mM EDTA | 0.1 mM CaCl <sub>2</sub> | 1 mM CaCl <sub>2</sub> | 10 mM CaCl <sub>2</sub> | 100 mM CaCl <sub>2</sub> | 7x TbCl <sub>3</sub> |
|----------|-----------|--------------------------|------------------------|-------------------------|--------------------------|----------------------|
| hOtolC1q | 44.2      | 46.1                     | 65.9                   | 87.1                    | 98.8                     | 84.2                 |
| R339S    | 43.7      | 45.2                     | 65.5                   | 86.9                    | 98.3                     | 82.7                 |
| R342W    | 37.1      | 35.7                     | 35.5                   | 86.9                    | 95.4                     | 75.2                 |
| R402P    | 46.8      | 47.0                     | 46.8                   | 46.4                    | 46.1                     | 47.1                 |
| Q426R    | 57.2      | 58.4                     | 61.6                   | 72.2                    | 89.6                     | 85.5                 |
